# Supplementary material for: Robust ferroelectric properties of organic croconic acid films grown on spintronically relevant substrates
Source: Royal Society of Chemistry journal article supplement (doi:10.1039/d0ma00147c), 2020-01-01
Supplement: d0ma00147c1.pdf [file d0ma00147c1.pdf]

## Electronic Supplementary material for Robust ferroelectric properties of organic Croconic Acid films grown on spintronically relevant substrates

Sambit Mohapatra<sup>\*a</sup>, Victor Da Costa <sup>a</sup>, Garen Avedissian <sup>a</sup>, Jacek Arabski <sup>a</sup>, Wolfgang Weber <sup>a</sup>,  
Martin Bowen <sup>a</sup>, Samy Boukari <sup>a</sup>

<sup>a</sup> Université de Strasbourg, CNRS, Institut de Physique et Chimie des Matériaux de Strasbourg,  
UMR 7504, F-67000 Strasbourg, France

<sup>\*</sup>Correspondence E-mail: sambit.mohapatra@ipcms.unistra.fr

### Supplementary figures:

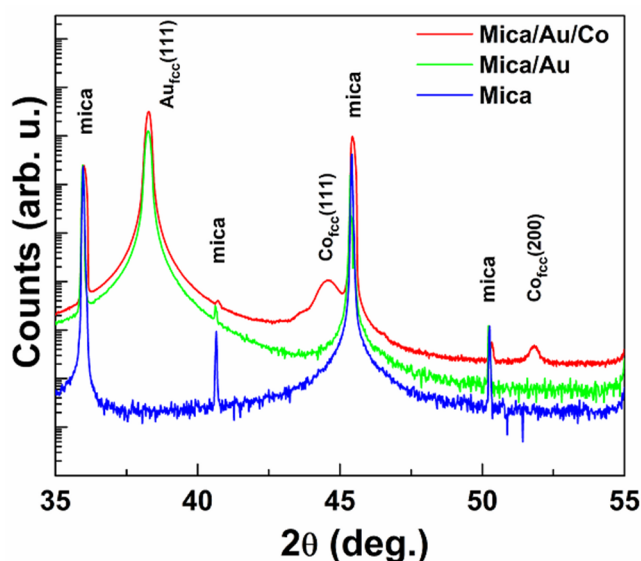

**Figure S1:** XRD of mica (blue), mica//Au (black) and mica//Au/Co (red) surfaces.

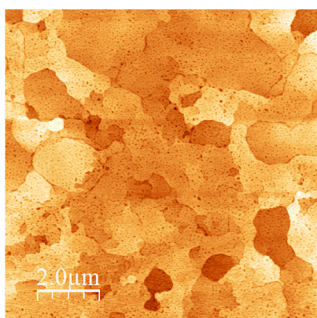

**Figure S2:** Surface morphology of mica/Au (150 nm) substrate showing micrometer sized flat terraces.

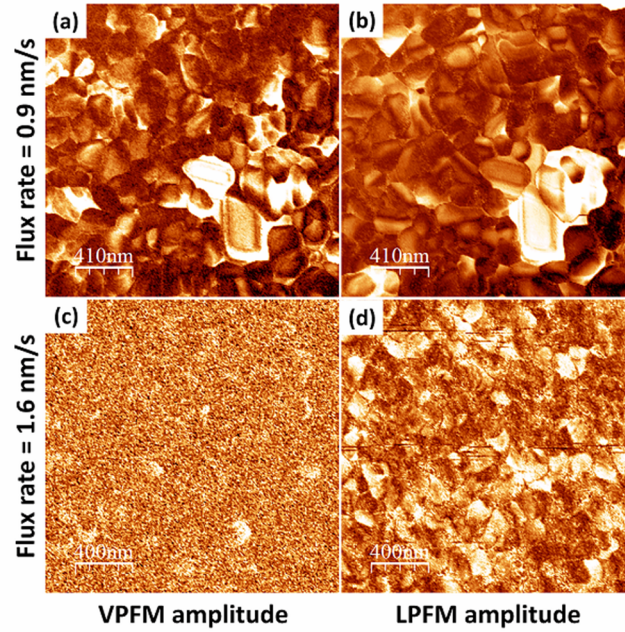

**Figure S3:** Flux rate dependence of PFM amplitudes for Au//CA (50nm) film, corresponding to figure 1 in the main text.

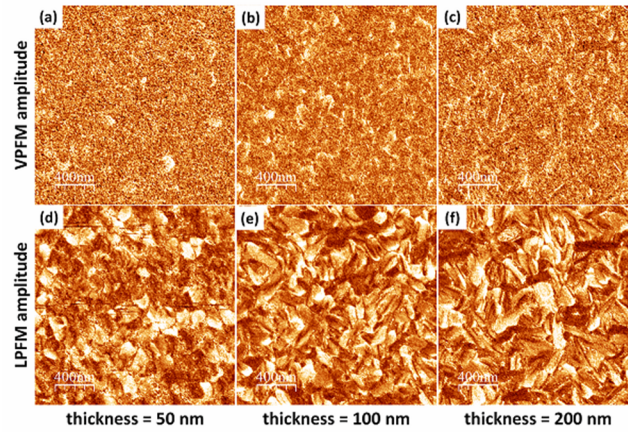

**Figure S4:** Thickness dependence of PFM amplitudes for a growth rate of 1.6nm/min on Au//CA, corresponding to figure 2 in the main text.

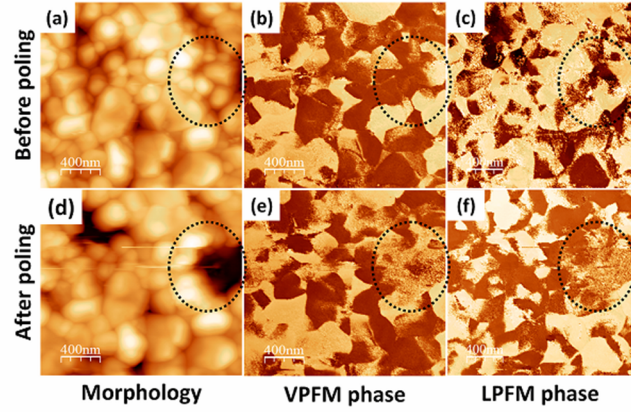

**Figure S5:** Impact of poling bias on the morphology of Au//CA (50 nm) sample.

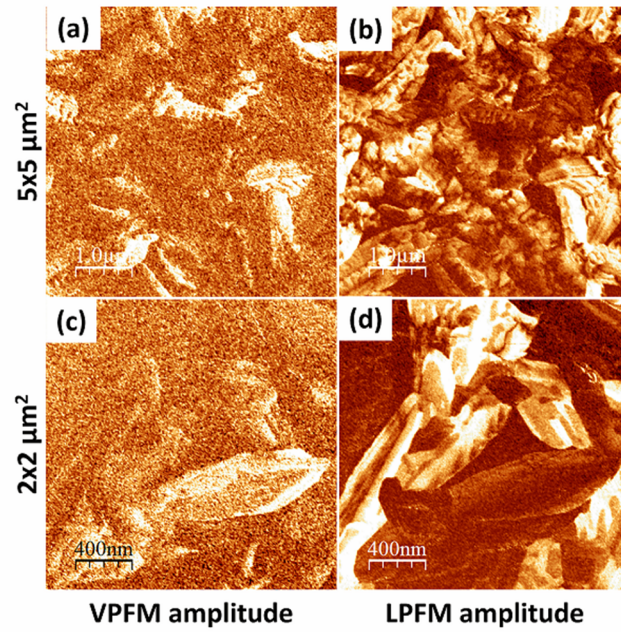

**Figure S6:** PFM amplitudes of Au//Co/CA (50 nm) sample, corresponding to figure 4 in the main text.

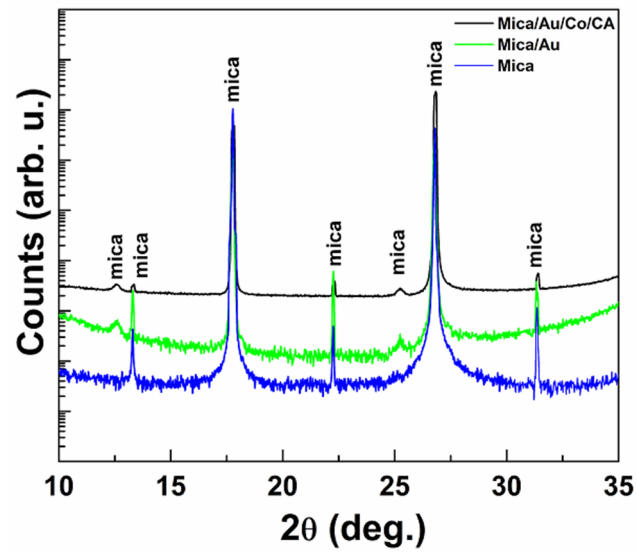

**Figure S7:** XRD of mica (blue), mica//Au (green) and mica//Au/Co/CA (black) surfaces. Densely populated peaks coming from the mica substrate hinders the observation of any crystalline peak coming from the CA layer.

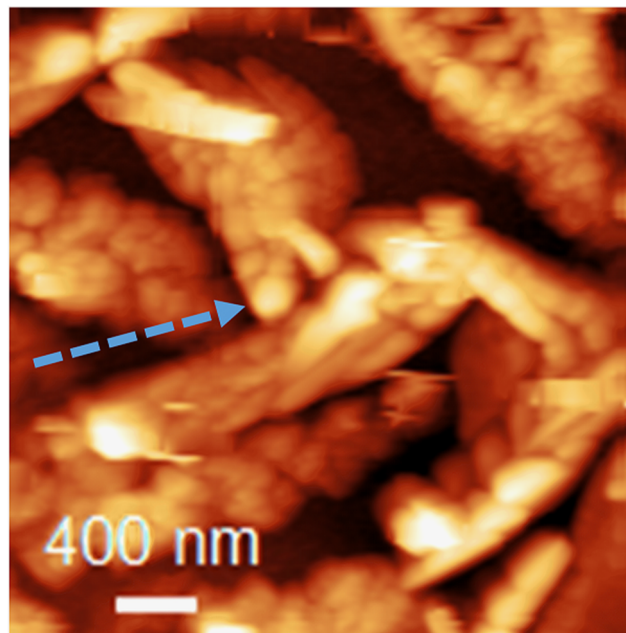

**Figure S8:** Surface morphology of the grain for which switching is shown in figure 5 in the main text.
